# Supplementary material
Source: PubMed Central journal article supplement (PMC4788084)
Supplement: hosd799890.w1_default.pdf [file hosd799890.w1_default.pdf]

**Appendix: Full list of Resuscitation Outcomes Consortium Investigators**

*Ottawa/OPALS, Ottawa Health Research Institute, University of Ottawa, Ottawa,*

*Ontario:* Ian Stiell, MD, Principal Investigator

Core Investigators: Christian Vaillancourt, MD

Coordinators: Cathy Clement, RN, Marc-Andre Da Ponti, A-EMCA, ACP, Stanley

Morrow, A-EMCA, ACP, Ghislaine Lepage, CHIM

EMS Investigators/Collaborators: Andrew Affleck, MD, Elaine Graham, ACP,

Participating EMS Agencies: Thunder Bay Fire Rescue Service, Superior North EMS

*Pittsburgh Resuscitation Network, University of Pittsburgh, Pittsburgh PA:* Clifton

Callaway, MD, PhD, Principal Investigator

Core Investigators: David Hostler, PhD, Jon Rittenberger, MD

Coordinators: Joseph Condle, Mitch Kampmeyer, Timothy Markham, Maureen

Morgan

EMS Investigators/Collaborators: Paul Sabol, Gina Sicchitano, Anthony Shrader,

Greg Stull, William Groft, Robert McCaughan, Rodney Rohrer, David Fuchs, MD,

Francis Guyette, MD, MS, William Jenkins, MD, Ronald Roth, MD, Heather Walker,

MD

Hospital Investigators: Thomas Campbell, MD, Ankur Doshi, MD, Bruce MacLeod,

MD

Participating EMS Agencies: City of Pittsburgh Bureau of EMS, City of Pittsburgh

Bureau of Fire, Mutual Aid Ambulance

*Seattle-King County Center for Resuscitation Research at the University of*

*Washington, University of Washington, Seattle WA:* Peter J. Kudenchuk, MD,

Principal Investigator

Core Investigators: Tom D. Rea, MD; Michael Copass, MD; Mickey S. Eisenberg,

MD

Coordinator: Debi Solberg, RN, MN; Sally Ragsdale, ARNP

EMS Investigators/Collaborators: Mike Helbock

Participating EMS Agencies: Bellevue Fire Department, Bothell Fire Department, Kirkland Fire KCFD 41, Snoqualmie Fire, Duvall Fire KCFPD 45, Fall City Fire KCFPD 27, Maple Valley Fire and Life Safety KCFPD #43, Mercer Island Fire Department, KCFD #44 North Highline Fire KCFD 11, Northshore/ Kenmore Fire KCFD 16, Redmond Fire Department, Shoreline Fire KCFD 4, Snoqualmie Pass Fire 51, South King County Medic 1, South King Fire & Rescue, Tukwila Fire Department, Woodinville Fire KCFD 36

**Steering Committee:** Chair: Myron Weisfeldt, MD, Johns Hopkins University School of Medicine, Baltimore, MD. Co-Chair–Cardiac: Joseph P. Ornato, MD, Virginia Commonwealth University Health System, Richmond, VA

**National Heart, Lung, and Blood Institute, Bethesda, MD:** George Sopko, MD, MPH, Debra Egan, MPH, David Lathrop, PhD, Alice Mascette, MD, Patrice Desvigne Nickens, MD, Colin Wu, PhD, Phyllis Mitchell, PhD, Tracey Hoke, MD  
**Clinical Trial Center, University of Washington, Department of Biostatistics, Seattle, WA:** Gerald van Belle, PhD, Scott Emerson, MD, PhD, Graham Nichol, MD, MPH, Judy Powell, BSN, Lois Van Ottingham, BSN, Gena Sears, BSN, Siobhan Everson-Stewart, PhD, Robert Schmicker, MS, Susanne May, PhD, Robert B. Ledingham, MS, Ben Bergsten-Buret, Richard Moore, BS, Amy Gest, MPA, Chi Shen, MS, Winnie Kirdpoo, BS, Jackie Berhorst, Al Hallstrom, PhD
